# Supplementary material
Source: PubMed Central journal article supplement (PMC3361414)
Supplement: 1205990109_pnas.201205990SI.pdf [file 1205990109_pnas.201205990SI.pdf]

# Supporting Information

Zhu et al. 10.1073/pnas.1205990109

## SI Materials and Methods

**RNA sequencing.** Identity of RNA component in T7 gp5.5–HNS complex was determined by sequence analysis as previously described (1), with some modification. Briefly, the RNA component was isolated from purified T7 gp5.5–HNS complex by phenol-chloroform extraction. After ligation to adaptors, RNA was amplified by reverse transcriptase. Reaction products were amplified by PCR and inserted into HindIII site in pUC19. DNA sequence analysis of the insert in the plasmid provided identity of RNA component.

**RNA Primed DNA Synthesis.** M13 ssDNA (8 nM) was incubated with 40 mM Tris-HCl (pH 7.5), 10 mM DTT, 10 mM MgCl<sub>2</sub>, 50 mM potassium glutamate, 600 μM dNTP containing [<sup>3</sup>H] dGTP, 10 μM RNA primer (ACCA or tRNA<sup>Arg</sup><sub>ACG</sub>), 150 nM 56-kDa gp4, and 100-nM T7 DNA polymerase at 37 °C. dGMP incorporated into the DNA in 5-μL reaction solution was counted at various time.

**Endonuclease Assays.** Endonucleolytic digestion of the supercoiled plasmid pUC(AT) was performed as previously described (2). The dsDNA with a 5′-ssDNA tail (flap) structure was prepared by annealing a 36-mer (5′-T<sub>16</sub> GAG GCA GTT CGA GTG GTG AG-3′) and a 16-mer (5′-CAG TGC TCG TGA ACT C-3′) to a 36-mer (5′-CTC ACC ACT CGA ACT GCC TCG AGT TCA CGA GCA CTG-3′). One of 36-mer was [<sup>32</sup>P] labeled. The DNA substrate (50 nM) was incubated with various amount of wild-type or altered gene 3 endonuclease at 37 °C for 20 min in a buffer containing 50 mM Tris-HCl (pH 7.9), 10 mM MgCl<sub>2</sub>, 1 mM DTT, and 100 mM NaCl. Reaction products were separated on 15% denaturing polyacrylamide Tris-borate-EDTA (TBE)

gel containing 7 M urea, and radioactivity in products was measured using a Fuji BAS 1000 Bioimaging analyzer.

**Substrates for Mobility Shift Assay.** The Y-shaped dsDNA substrate was prepared by annealing a [<sup>32</sup>P]-labeled 75-mer (5′-CGC CGG GTA CCG AGC TCG AAT TCA CTG GCC GTC GTT TTA CAA CGT CGT GAC ATG CCT<sub>19-3′</sub>) to a 95-mer (5′-T<sub>39</sub> GGC ATG TCA CGA CGT TGT AAA ACG ACG GCC AGT GAA TTC GAG CTC GGT ACC CGG CG-3′). The ssDNA substrate was the [<sup>32</sup>P]-labeled 75-mer only, and the dsDNA substrate with an ssDNA tail was prepared by annealing the [<sup>32</sup>P]-labeled 75-mer (5′-CGC CGG GTA CCG AGC TCG AAT TCA CTG GCC GTC GTT TTA CAA CGT CGT GAC ATG CCT<sub>19-3′</sub>) to a 55-mer (5′-GC ATG TCA CGA CGT TGT AAA ACG ACG GCC AGT GAA TTC GAG CTC GGT ACC CGG CG-3′).

**DNA Unwinding Assay.** Assays were performed as described previously (3), except that various amounts of gp4 were used and H-NS or H-NS/gp5.5/transfer RNA (tRNA) complex was added in some reactions.

**DNA Synthesis Assay.** To measure the effect of H-NS on DNA synthesis, the mixture containing 40 mM Tris-HCl (pH 7.5), 10 mM DTT, 10 mM MgCl<sub>2</sub>, 50 mM potassium glutamate, 600 μM dNTP containing [<sup>3</sup>H] dGTP, 8 nM M13 ssDNA annealed with primer or M13 dsDNA, 100 nM T7 DNA polymerase. The 56-kDa gp4 (150 nM) and/or designated amount of H-NS or H-NS/gp5.5/tRNA complex were added in indicated reactions.

1. Lau NC, Lim LP, Weinstein EG, Bartel DP (2001) An abundant class of tiny RNAs with probable regulatory roles in *Caenorhabditis elegans*. *Science* 294:858–862.
2. Lee SJ, Chowdhury K, Tabor S, Richardson CC (2009) Rescue of bacteriophage T7 DNA polymerase of low processivity by suppressor mutations affecting gene 3 endonuclease. *J Virol* 83:8418–8427.

3. Zhu B, Lee SJ, Richardson CC (2009) An in trans interaction at the interface of the helicase and primase domains of the hexameric gene 4 protein of bacteriophage T7 modulates their activities. *J Biol Chem* 284:23842–23851.

A Growth of suppressors with Helicase(259-566) only

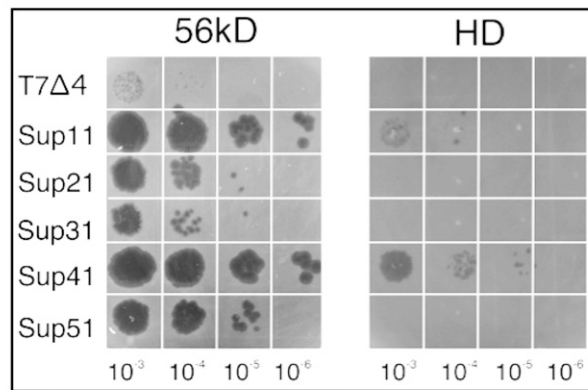

B Growth of suppressors with 56-kDa-D237A protein

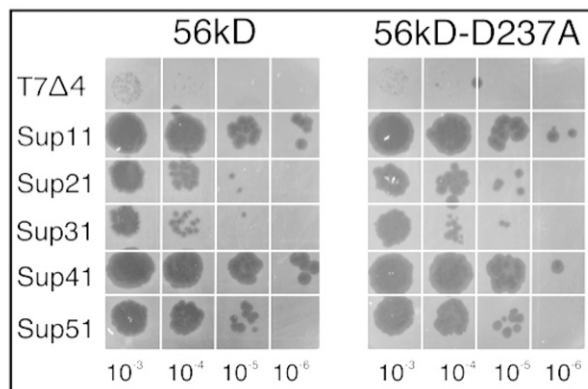

**Fig. S1.** T7 phage suppressors require more than helicase domain but not an active site of primase. (A) Infection of wild-type and suppressor T7Δ4 phages on *Escherichia coli* expressing 56-kDa gp4 or helicase domain only. (B) Infection of wild-type and suppressor T7Δ4 phages on *E. coli* expressing 56-kDa gp4 or 56-kDa gp4 containing substitution of Ala for Asp237 that disrupts the primase active site.





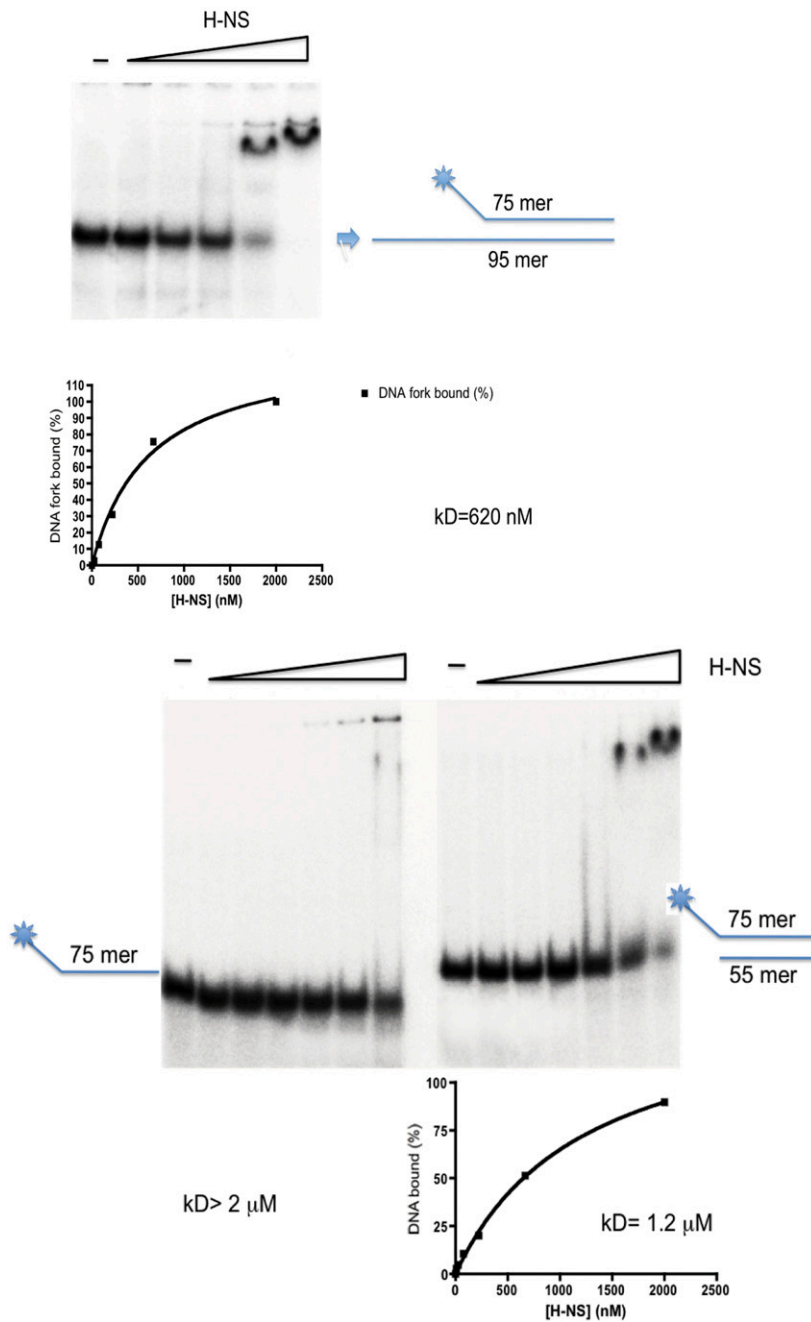

Fig. 55. Binding of H-NS to a Y-shaped dsDNA, an ssDNA, or a dsDNA with ssDNA tail analyzed by mobility shift assay. Substrates preparation is described in *SI Materials and Methods* and reaction conditions are described in *Materials and Methods*.

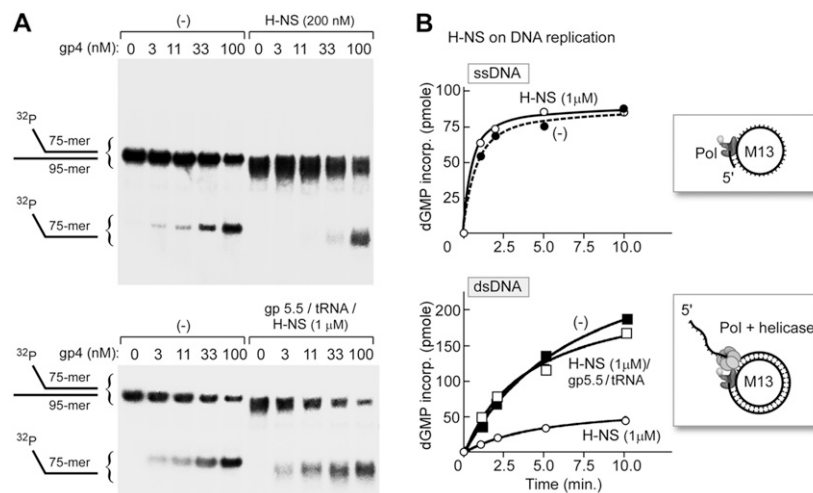

**Fig. S6.** Inhibitory effect of *E. coli* H-NS on DNA helicase. (A) H-NS inhibits DNA unwinding by T7 gp4 helicase. Unwinding of dsDNA by T7 gp4 helicase (33 nM) is inhibited by 200 nM H-NS. H-NS (1  $\mu$ M) in complex with gp5.5 and tRNA does not show an inhibitory effect. (B) DNA synthesis catalyzed by T7 DNA polymerase on circular ssDNA bearing a primer is not affected by 1  $\mu$ M H-NS. Leading-strand DNA synthesis mediated by T7 DNA polymerase and helicase is inhibited by 1  $\mu$ M H-NS but not by H-NS in complex with gp5.5 and tRNA.

**Table S1. Sequencing data of RNAs in complex with gp5.5 and H-NS**

| Sequence | Sequence (5'-3')                                                                                                                                                                           | Antiparallel sequence (5'-3')                                                                    | Identity (sequence in red)                                    |
|----------|--------------------------------------------------------------------------------------------------------------------------------------------------------------------------------------------|--------------------------------------------------------------------------------------------------|---------------------------------------------------------------|
| Seq. 1   | tggtgggggctatagctcagctgggagagcgctgcag                                                                                                                                                      |                                                                                                  | 1–32 nt of <i>E. coli</i> tRNA <sup>Ala</sup> <sub>GGC</sub>  |
| Seq. 2   | tggagcgggaacgagactgaaactcgcgacccgacctt<br>ggcaag                                                                                                                                           | <u>cttccaaggctcgggctcgcgagctcgagctctgcttcccg</u><br><u>ctcca</u>                                 | 31–76 nt of <i>E. coli</i> tRNA <sup>Gly</sup> <sub>GCC</sub> |
| Seq. 3   | tggcgctcccaggggattcgaaccctgtaccgccgtgaaa<br>gggcggtgtcctggccctctagacgaaggggacgg                                                                                                            | <u>ccgtccccttcgtctagagggccaggacaccgccccttca</u><br><u>cggcggtaacaggggttcqaatcccctaggggacgcca</u> | Full length <i>E. coli</i> tRNA <sup>Glu</sup> <sub>TTC</sub> |
| Seq. 4   | caaaagagatcgctggaagccctgcctggggtgaagcgtt<br>aaaactaatcaggctagttgttagtgccgtgtccgtccgcag<br>ctggcaagcgaatataaagactgactaagcatgtagtaccg<br>aggatgtaggaaattcggacgcgggttcaactcccgcagct<br>ccacca |                                                                                                  | 3'-fragment of <i>E. coli</i> tmRNA                           |

Identity of RNAs is based on the sequences shown in red.
